# Supplementary material for: Identification of markers for neurescence through transcriptomic profiling of postmortem human brains
Source: NPJ Aging. 2025 Jul 1;11(1):57. doi: 10.1038/s41514-025-00235-y (PMC12214559; doi:10.1038/s41514-025-00235-y)
Supplement: Supplementary file 2 — Supplementary table 1 [file 41514_2025_235_MOESM2_ESM.xlsx]

## Sheet: Mathys2019
CSP		SIP		SenMayo
Gene	Weights	Gene	Weights	Gene	Weights
CDKN2D	0.587701	SOD1	0.68358	HMGB1	0.561894
ETS2	0.515136	MAP2K1	0.602406	ETS2	0.451207
RB1	0.495299	GSK3B	0.585284	CTNNB1	0.445699
E2F3	0.486027	PIK3CA	0.56645	CTSB	0.432795
CDK6	0.472788	SOD2	0.555272	NRG1	0.409475
RBL2	0.469541	MAPK14	0.542551	NAP1L4	0.405755
ATM	0.421865	IGF1R	0.539367	TIMP2	0.400795
BMI1	0.378741	TP53BP1	0.525724	IGFBP4	0.399378
MDM2	0.356708	NBN	0.44401	IGFBP6	0.391305
CDK4	0.258885	HRAS	0.409152	IGFBP5	0.383959
CCNE1	0.212868	CITED2	0.40151	RPS6KA5	0.38084
E2F1	0.185244	CREG1	0.368382	ACVR1B	0.378471
CHEK2	0.178749	ABL1	0.363181	JUN	0.368959
CHEK1	0.171554	MORC3	0.356893	IL6ST	0.359181
CDKN1A	0.156781	NFKB1	0.350354	IGFBP7	0.353087
TWIST1	0.135076	AKT1	0.316145	IGFBP2	0.338363
CCND1	0.126154	CDKN1B	0.315616	PECAM1	0.32966
ETS1	0.110534	EGR1	0.313335	KITLG	0.314377
TP53	0.104902	RBL1	0.293457	VGF	0.305215
CDKN2A	0.0276953	MAP2K6	0.285432	ITPKA	0.303219
CDK2	0.0245571	IGF1	0.280544	TUBGCP2	0.268285
SATB1	-0.00137449	IRF3	0.280012	EDN1	0.259883
		PCNA	0.263555	IGFBP1	0.253045
		GADD45A	0.245014	PTBP1	0.251457
		MAP2K3	0.244237	PGF	0.244635
		IGFBP5	0.243941	TNFRSF11B	0.238657
		SIRT1	0.241834	FGF7	0.236044
		ING1	0.231374	PIGF	0.224954
		TGFB1	0.222842	TNFRSF1A	0.223489
		TERF2	0.218793	EGFR	0.220259
		CCNB1	0.160468	VEGFA	0.208402
		PRKCD	0.146106	MMP14	0.206423
		CDC25C	0.137148	IL32	0.202017
		IGFBP3	0.129968	CSF1	0.201285
		ALDH1A3	0.129145	IGFBP3	0.199664
		MYC	0.118453	PLAUR	0.198635
		NOX4	0.0975984	INHA	0.197964
		CCNA2	0.0933733	VEGFC	0.195679
		CDKN2C	0.0886024	PLAT	0.192684
		TERT	0.0670459	EGF	0.189397
		ID1	0.0602962	PTGES	0.188584
		IGFBP7	0.0538785	GEM	0.188251
		CDKN1C	0.0442551	SERPINE2	0.18738
		IRF7	-0.00900451	CD55	0.185017
		IFNG	-0.00837166	ANGPTL4	0.179747
		CDKN2B	0.00768552	MMP2	0.167346
		PLAU	0.00750897	SEMA3F	0.16734
		IRF5	0.000786597	IGF1	0.16693
				ANGPT1	0.166926
				FGF2	0.161548
				PAPPA	0.159974
				FAS	0.15384
				HGF	0.149843
				IL7	0.146409
				IL6	0.14639
				CXCL12	0.145015
				CXCL16	0.138835
				BMP6	0.138694
				FGF1	0.131351
				CD9	0.123231
				SCAMP4	0.120488
				GDF15	0.113651
				AXL	0.111504
				DKK1	0.104763
				ICAM1	0.104565
				CXCL2	0.095975
				CXCL8	0.0926371
				CXCL1	0.0919122
				WNT2	0.083818
				WNT16	0.0828356
				IQGAP2	0.0683674
				IL15	0.0680766
				GMFG	0.0669297
				SPP1	-0.0651336
				SPX	0.0643018
				CCL26	0.0611646
				IL18	0.0550652
				CCL2	0.0547084
				CXCL3	0.0509726
				SERPINE1	0.0472975
				MIF	0.0436082
				PLAU	0.0425829
				MMP9	0.0404313
				EREG	0.0385526
				SELPLG	-0.0365136
				MMP1	0.0322494
				TNFRSF1B	-0.0303861
				CCL24	0.0282513
				BMP2	0.0280887
				CCL4	-0.0260546
				MMP12	0.0249125
				LCP1	-0.0233919
				IL1B	-0.0202281
				CCL3	-0.0175666
				IL13	0.0169215
				CSF2RB	0.0167369
				C3	0.0155397
				ICAM3	0.0155293
				MMP10	0.0125228
				MMP3	0.0115833
				ITGA2	0.011451
				TNF	-0.0103477
				CCL20	-0.00963017
				CXCL10	0.00863003
				CXCR2	0.00832825
				CCL8	-0.00824442
				CCL1	0.00740483
				CCL16	0.0068628
				AREG	0.00641891
				TNFRSF10C	0.00629984
				PTGER2	-0.00557552
				ESM1	0.00522484
				CCL5	0.00448551
				IL1A	-0.0015301
				MMP13	0.00102379
				IL10	-0.000392716

## Sheet: Mathys2024
CSP		SIP		SenMayo
Gene	Weights	Gene	Weights	Gene	Weights
RB1	0.667895	GSK3B	0.732379	BEX3	0.630359
ATM	0.612292	MAPK14	0.686683	HMGB1	0.602536
E2F3	0.591834	PIK3CA	0.683537	CTNNB1	0.601595
CDK6	0.580165	IGF1R	0.672827	ACVR1B	0.574271
RBL2	0.570225	TP53BP1	0.655807	NAP1L4	0.527637
MDM2	0.525053	MAP2K1	0.609177	RPS6KA5	0.520672
ETS2	0.522384	SOD1	0.585032	NRG1	0.508781
CDKN2D	0.486859	NBN	0.548144	KITLG	0.475554
BMI1	0.361019	NFKB1	0.539371	TUBGCP2	0.43905
CDK4	0.264337	ABL1	0.528905	ETS2	0.420593
TWIST1	0.235158	MORC3	0.503489	TIMP2	0.412961
CCNE1	0.232801	CREG1	0.469098	JUN	0.399853
CHEK1	0.231966	MAP2K6	0.46904	CTSB	0.386901
CHEK2	0.205744	RBL1	0.401273	IL6ST	0.383379
ETS1	0.177839	HRAS	0.400383	ITPKA	0.37043
CDKN1A	0.16948	SIRT1	0.391054	PTBP1	0.366176
CCND1	0.166825	AKT1	0.383429	PIGF	0.345305
E2F1	0.161194	CITED2	0.381726	IGFBP5	0.345124
CDKN2A	0.126673	TERF2	0.36895	VGF	0.338736
TP53	0.107223	CDKN1B	0.341851	SCAMP4	0.32378
CDK2	0.0768312	MAP2K3	0.313897	INHA	0.315825
SATB1	0.0182227	ING1	0.313719	IL7	0.297196
		IGF1	0.299728	IGFBP2	0.290931
		IGFBP5	0.272518	SERPINE2	0.273913
		EGR1	0.269237	VEGFA	0.269654
		PCNA	0.242044	EGF	0.264145
		CCNB1	0.237738	IGFBP3	0.26242
		IGFBP3	0.226963	IGF1	0.262153
		IRF3	0.225494	FGF7	0.251169
		CCNA2	0.202617	SEMA3F	0.247029
		GADD45A	0.202423	CD55	0.243553
		NOX4	0.167855	IGFBP4	0.239206
		CDC25C	0.160334	PAPPA	0.236439
		PRKCD	0.131423	FGF2	0.229264
		ALDH1A3	0.123549	IGFBP6	0.226831
		SOD2	0.12275	BMP6	0.226683
		TGFB1	0.111305	EGFR	0.225909
		MYC	0.102045	IGFBP7	0.221391
		TERT	0.0940169	ANGPT1	0.214739
		CDKN2C	0.0770304	TNFRSF1A	0.194778
		CDKN1C	0.0687892	FAS	0.182683
		CDKN2B	0.0488865	VEGFC	0.176377
		IGFBP7	0.048187	WNT2	0.171279
		ID1	0.0474016	GEM	0.169058
		PLAU	0.0338164	PLAUR	0.168773
		IRF7	0.0160193	HGF	0.167901
		IRF5	0.00760942	EDN1	0.159414
		IFNG	-0.00409115	PGF	0.15607
				PTGES	0.152972
				IQGAP2	0.145959
				IL15	0.144012
				IL32	0.135534
				GDF15	0.132838
				GMFG	0.132189
				CXCL12	0.128671
				CSF1	0.127754
				WNT16	0.123327
				BMP2	0.117147
				MMP14	0.115298
				PLAT	0.11476
				SPP1	-0.112962
				ICAM1	0.11287
				ANGPTL4	0.111515
				SPX	0.106125
				DKK1	0.105032
				CCL26	0.10113
				CXCL1	0.0952123
				CCL2	0.0871764
				TNFRSF11B	0.0851161
				IL6	0.081428
				MMP2	0.0765517
				ICAM3	0.0764998
				CXCL2	0.0742254
				FGF1	0.0729507
				CXCL8	0.0688485
				AXL	0.0674057
				PTGER2	0.0655557
				PLAU	0.0652305
				IGFBP1	0.0620515
				SERPINE1	0.0595223
				EREG	0.055206
				MMP9	0.0534799
				CXCL3	0.0519422
				AREG	0.0466176
				IL13	0.0457642
				ESM1	0.042955
				CCL5	0.0423514
				CCL3L1	0.0407462
				MIF	0.0393796
				C3	-0.0347801
				MMP1	0.0330724
				CXCL10	0.0282855
				CCL24	0.0267461
				ITGA2	-0.0263609
				CD9	0.0250775
				MMP12	0.0225958
				CCL1	0.0224227
				CXCR2	0.0222239
				SERPINB4	0.0204115
				CXCL16	0.0184008
				CCL20	0.0158196
				CCL16	0.0153406
				MMP10	0.0135031
				TNFRSF1B	0.0133772
				TNFRSF10C	0.0130722
				MMP3	0.0125577
				IL1B	-0.0125564
				CCL7	0.0118821
				MMP13	0.0111597
				CCL8	0.0104673
				IL18	-0.00757432
				LCP1	-0.00655206
				IL10	0.00626682
				IL1A	-0.00592025
				SELPLG	-0.00563888
				CCL13	0.00559523
				CSF2	0.00502911
				CSF2RB	0.0036859
				CST4	0.00201844
				TNF	-0.00136395
				IL2	-0.000839414
				CCL3	0.000680751
