# Supplementary material for: Identification of markers for neurescence through transcriptomic profiling of postmortem human brains
Source: NPJ Aging. 2025 Jul 1;11(1):57. doi: 10.1038/s41514-025-00235-y (PMC12214559; doi:10.1038/s41514-025-00235-y)
Supplement: Supplementary file 3 — Supplementary table 2 [file 41514_2025_235_MOESM3_ESM.xlsx]

## Sheet: SigEmd
Gene	emd	pvalue	padjust
NGFRAP1	37.7923	0	0
TUBB2A	37.6753	0	0
BEX1	37.5221	0	0
NEFL	37.3356	0	0
STMN2	37.1809	0	0
SOD1	37.0941	0	0
DYNLL1	37.0847	0	0
GAP43	36.7252	0	0
HINT1	36.6829	0	0
SEPW1	36.6783	0	0
YWHAH	36.4544	0	0
NDUFA4	36.3678	0	0
UQCRH	36.3123	0	0
NEFM	36.2828	0	0
BEX2	36.1092	0	0
TUBA4A	35.9145	0	0
SCG5	35.6375	0	0
COX7C	35.4739	0	0
C14orf2	35.3829	0	0
ISCU	35.2321	0	0
TUBB4B	35.1676	0	0
BEX4	35.1443	0	0
TMSB4X	34.9681	0	0
ALDOA	34.7956	0	0
MLLT11	34.7636	0	0
SRP14	34.6534	0	0
FTH1	34.6463	0	0
ATP6AP2	34.6326	0	0
SRSF5	34.5684	0	0
ATPIF1	34.5505	0	0
ATP1A1	34.4608	0	0
MTCH1	34.3887	0	0
PCMT1	34.3504	0	0
CREG2	34.331	0	0
ATP6V1F	34.3191	0	0
RGS4	34.22	0	0
SNCA	34.2034	0	0
FAM153B	34.1869	0	0
TPI1	34.1411	0	0
MGST3	34.1384	0	0
DYNC1H1	34.1174	0	0
SKP1	34.0732	0	0
APOO	34.0375	0	0
HSP90AA1	33.985	0	0
UBC	33.9837	0	0
ATL1	33.9695	0	0
EID1	33.9561	0	0
PDXDC1	33.896	0	0
PAK1	33.8491	0	0
OCIAD1	33.8393	0	0
APLP2	33.8284	0	0
PPIA	33.8123	0	0
SNCB	33.8117	0	0
VDAC3	33.7961	0	0
GPX4	33.7875	0	0
SEC62	33.7776	0	0
TSPAN7	33.7417	0	0
ITM2B	33.7101	0	0
RPS15	33.7053	0	0
CLTC	33.6873	0	0
ATP6V1H	33.6577	0	0
RPL13	33.6175	0	0
SUB1	33.5865	0	0
CCNI	33.5815	0	0
FLOT1	33.5642	0	0
REEP5	33.5393	0	0
GUK1	33.5207	0	0
CISD1	33.5201	0	0
ATP5J	33.5196	0	0
LDHB	33.4944	0	0
ATP6V1D	33.4746	0	0
TPT1	33.456	0	0
RAB11A	33.4484	0	0
ACOT7	33.4158	0	0
ARF1	33.3847	0	0
DDX5	33.3813	0	0
ATP5G3	33.3765	0	0
DYNLRB1	33.3623	0	0
SV2B	33.3414	0	0
DSTN	33.3374	0	0
SLC39A10	33.3372	0	0
TMEM59L	33.3347	0	0
PEBP1	33.314	0	0
ATP2A2	33.2964	0	0
TMA7	33.2904	0	0
PAFAH1B1	33.2819	0	0
ATP5L	33.2405	0	0
PDP1	33.229	0	0
CLTA	33.2196	0	0
THY1	33.217	0	0
COX6C	33.2096	0	0
HSPH1	33.2076	0	0
GOT1	33.2061	0	0
RPS14	33.204	0	0
NDFIP1	33.1783	0	0
PLEKHA1	33.1704	0	0
KIF3A	33.1652	0	0
FTL	33.1635	0	0
SLC25A3	33.1499	0	0
EEF1A1	33.1164	0	0
SERINC1	33.0746	0	0
YWHAB	33.0698	0	0
TXNRD1	33.0405	0	0
KIFAP3	33.0403	0	0
CYCS	33.0329	0	0
SNX3	33.0029	0	0
NCOA7	32.9983	0	0
YWHAZ	32.9734	0	0
RPL13A	32.9571	0	0
VPS35	32.9403	0	0
C16orf45	32.9129	0	0
NAP1L1	32.9078	0	0
ACTR2	32.8983	0	0
EIF4A2	32.8712	0	0
RHEB	32.8538	0	0
RPL7A	32.8294	0	0
MORF4L2	32.8079	0	0
FAM134B	32.8018	0	0
TUBB4A	32.7979	0	0
TMOD2	32.7842	0	0
TBCA	32.7823	0	0
RPSA	32.7823	0	0
FAM153C	32.7752	0	0
STMN3	32.7652	0	0
FAM213A	32.7528	0	0
SNX10	32.7498	0	0
PJA2	32.7468	0	0
TCEAL2	32.74	0	0
CCK	32.7303	0	0
CHCHD2	32.7237	0	0
UBE2B	32.703	0	0
ATP6V1E1	32.6604	0	0
TBRG1	32.6562	0	0
CALM3	32.6537	0	0
TAX1BP1	32.6482	0	0
KIAA1211L	32.6178	0	0
GHITM	32.6125	0	0
SYP	32.61	0	0
CLU	32.6093	0	0
SH3GL2	32.6053	0	0
ENC1	32.6014	0	0
ID2	32.591	0	0
RPL10	32.5891	0	0
EIF5	32.5793	0	0
C9orf16	32.5789	0	0
GNB1	32.5737	0	0
YWHAG	32.5726	0	0
ACSL3	32.5543	0	0
GNG3	32.5207	0	0
CAMK2G	32.4931	0	0
ATP1A3	32.4811	0	0
FKBP8	32.4766	0	0
SEPT11	32.4664	0	0
RABAC1	32.4075	0	0
PRKAR1A	32.3853	0	0
SULT4A1	32.3745	0	0
CHGA	32.3741	0	0
LDHA	32.3711	0	0
DCAF6	32.3696	0	0
BRK1	32.3645	0	0
RAB6A	32.334	0	0
RPL6	32.3147	0	0
SEZ6L2	32.2969	0	0
PSMA7	32.2807	0	0
RPL14	32.2466	0	0
GABARAPL2	32.2427	0	0
GABRA1	32.2106	0	0
NRN1	32.1892	0	0
NRG1	32.1876	0	0
RAPH1	32.1796	0	0
PSAP	32.1717	0	0
RNPS1	32.1675	0	0
MYH10	32.1392	0	0
GABBR1	32.1324	0	0
AMBRA1	32.1195	0	0
TACC1	32.1086	0	0
MAP2K4	32.1026	0	0
NIN	32.098	0	0
DDX24	32.0888	0	0
KIF21A	32.0548	0	0
PPP1R12A	32.0482	0	0
DPYSL2	32.044	0	0
PPP3CB	32.0411	0	0
DNAJC6	32.0281	0	0
BSN	32.0278	0	0
CHCHD3	32.023	0	0
WASF1	32.0188	0	0
MRPS21	32.014	0	0
TOMM20	31.9907	0	0
TMEM160	31.9882	0	0
KCNK1	31.9853	0	0
MICAL2	31.9843	0	0
NLRP1	31.9579	0	0
BNIP3L	31.9457	0	0
ATP5A1	31.9356	0	0
GABRG2	31.9263	0	0
C11orf49	31.9212	0	0
ENO2	31.9026	0	0
UQCRB	31.8913	0	0
UBE2V2	31.8853	0	0
RPS2	31.8771	0	0
HMGB1	31.8651	0	0
ATP6V0B	31.8597	0	0
SEPT7	31.8545	0	0
PAPSS1	31.8515	0	0
RAB1A	31.843	0	0
CAP2	31.8405	0	0
MGEA5	31.8321	0	0
GABARAPL1	31.832	0	0
KIAA0930	31.8278	0	0
TRIM2	31.8077	0	0
HNRNPDL	31.8058	0	0
GLS	31.7935	0	0
RHBDD2	31.7908	0	0
TCF25	31.7888	0	0
HMGN3	31.7837	0	0
CKB	31.783	0	0
RPL28	31.7759	0	0
UGP2	31.7691	0	0
WBP2	31.7599	0	0
ACYP2	31.7522	0	0
VAPA	31.7466	0	0
GAS7	31.7174	0	0
SERINC3	31.7132	0	0
RPS25	31.7123	0	0
UBE2D3	31.708	0	0
OSBPL1A	31.6968	0	0
ATP9A	31.6686	0	0
FOCAD	31.6666	0	0
RAB2A	31.662	0	0
PNMA2	31.6544	0	0
UCHL1	31.6462	0	0
RABGAP1	31.6437	0	0
LONRF2	31.6254	0	0
ZNF483	31.6167	0	0
PGRMC1	31.6128	0	0
PTMA	31.6071	0	0
NGEF	31.6019	0	0
GFOD1	31.5999	0	0
LMO4	31.5979	0	0
PRUNE2	31.5945	0	0
NDRG4	31.5886	0	0
ELMO1	31.5884	0	0
CSNK1A1	31.5878	0	0
FAM126B	31.5819	0	0
FEZ2	31.5812	0	0
DIRAS2	31.5722	0	0
ARHGEF9	31.5594	0	0
PINK1	31.5572	0	0
RSRP1	31.5503	0	0
NUDT3	31.5424	0	0
GDAP1	31.5378	0	0
PDE5A	31.5222	0	0
APBA2	31.5121	0	0
RPLP1	31.5047	0	0
ARHGEF3	31.502	0	0
NMNAT2	31.4948	0	0
PPM1K	31.479	0	0
SPTBN1	31.4771	0	0
KIF5A	31.4663	0	0
NDUFS1	31.4634	0	0
HACD3	31.4591	0	0
ACACA	31.4507	0	0
PRKAG2	31.4507	0	0
NR3C1	31.4312	0	0
ATP6V1C1	31.4239	0	0
TSPAN13	31.4168	0	0
SATB2	31.4162	0	0
SNU13	31.4099	0	0
CYFIP2	31.4046	0	0
NCKAP1	31.3994	0	0
PGM2L1	31.3854	0	0
RPL35A	31.3844	0	0
TTC1	31.3815	0	0
TMEM14A	31.3812	0	0
SYNJ1	31.3787	0	0
HPRT1	31.3764	0	0
HOMER1	31.3684	0	0
SOD2	31.3579	0	0
MAP1A	31.355	0	0
VPS13A	31.3543	0	0
UBE3A	31.3472	0	0
RPL7	31.3459	0	0
CACNG8	31.3412	0	0
YWHAE	31.335	0	0
SYT11	31.3344	0	0
DZIP3	31.326	0	0
BCAP29	31.3245	0	0
USP33	31.3242	0	0
DNAJB6	31.3236	0	0
RPL29	31.3214	0	0
TERF2IP	31.3165	0	0
AP3S1	31.3146	0	0
CES4A	31.3135	0	0
ADAM23	31.3131	0	0
CA11	31.3124	0	0
SPTAN1	31.3032	0	0
PEA15	31.3032	0	0
NUAK1	31.2977	0	0
MTDH	31.2971	0	0
CAPZA2	31.2908	0	0
UQCRHL	31.2904	0	0
CCSER2	31.2889	0	0
GLRB	31.2741	0	0
OPTN	31.2714	0	0
UBR3	31.2583	0	0
SERF2	31.2526	0	0
ARHGEF7	31.2505	0	0
BNIP3	31.222	0	0
ATP6V1G1	31.2209	0	0
ARID4A	31.2202	0	0
SPATS2	31.2014	0	0
SLC22A17	31.201	0	0
ABI2	31.2002	0	0
RUFY3	31.1856	0	0
HSPA12A	31.1749	0	0
RABEP1	31.1734	0	0
MARCH6	31.17	0	0
SAT2	31.1659	0	0
PGBD5	31.1557	0	0
AMPH	31.1491	0	0
COX7A2L	31.14	0	0
GPM6B	31.1378	0	0
TMEM130	31.1316	0	0
CCPG1	31.1299	0	0
CDKL5	31.1223	0	0
RBM39	31.1107	0	0
USP11	31.1056	0	0
SCOC	31.1012	0	0
KDM5B	31.0945	0	0
SORL1	31.0897	0	0
RPS7	31.0831	0	0
PLD3	31.0692	0	0
HNRNPA2B1	31.0664	0	0
NRD1	31.0606	0	0
ACTN1	31.0604	0	0
TAOK1	31.0484	0	0
SAP18	31.0413	0	0
ACTB	31.0346	0	0
PPP2R2C	31.0346	0	0
KIF5C	31.0313	0	0
RPL32	31.008	0	0
SPCS1	30.9985	0	0
VPS53	30.9979	0	0
ATP2B4	30.9923	0	0
ZNF365	30.983	0	0
RPL19	30.9734	0	0
WDR7	30.9668	0	0
ARL15	30.9593	0	0
G3BP2	30.9587	0	0
NLK	30.9556	0	0
VPS41	30.9545	0	0
AES	30.954	0	0
PIK3R1	30.953	0	0
B4GAT1	30.9514	0	0
NPEPPS	30.9456	0	0
FRRS1L	30.9431	0	0
GPATCH8	30.9416	0	0
LY6H	30.9409	0	0
SERPINI1	30.9358	0	0
KIAA0513	30.9348	0	0
JAZF1	30.9325	0	0
FAM134A	30.9321	0	0
FMNL2	30.9229	0	0
SCD5	30.8959	0	0
TTC37	30.8913	0	0
OLFM1	30.8846	0	0
GDI1	30.8846	0	0
TOLLIP	30.8748	0	0
ARMC9	30.8734	0	0
ROCK2	30.8732	0	0
GCC2	30.8726	0	0
CHL1	30.8649	0	0
TRIM44	30.8521	0	0
PKM	30.8467	0	0
NFASC	30.8428	0	0
CSDE1	30.8396	0	0
TAF15	30.8344	0	0
MBNL2	30.8301	0	0
PI4KA	30.8293	0	0
MYO1D	30.8248	0	0
CCNY	30.818	0	0
UBE2K	30.8124	0	0
TRIM37	30.8027	0	0
PSMD1	30.7949	0	0
KIAA1107	30.7847	0	0
BMPR2	30.7785	0	0
MLF2	30.7782	0	0
RTF1	30.7736	0	0
PRDM2	30.7716	0	0
RIC3	30.7695	0	0
ABR	30.7684	0	0
UQCRC2	30.7675	0	0
ETS2	30.7647	0	0
TULP4	30.7513	0	0
ARGLU1	30.7496	0	0
KCTD1	30.7455	0	0
MAPK1	30.7391	0	0
ATCAY	30.7351	0	0
DNM1L	30.731	0	0
SLC25A6	30.7098	0	0
UNC80	30.7027	0	0
TBL1XR1	30.6957	0	0
RPL34	30.6887	0	0
IQSEC1	30.6834	0	0
BTF3	30.6821	0	0
TENM4	30.6813	0	0
PLCL1	30.6789	0	0
ZRANB2	30.678	0	0
ATXN10	30.6732	0	0
RAP1GAP2	30.6722	0	0
FBXL2	30.6721	0	0
RNF11	30.672	0	0
NRGN	30.6715	0	0
H2AFZ	30.6653	0	0
AP2S1	30.6603	0	0
AKAP13	30.6593	0	0
FAM171A1	30.6572	0	0
NDFIP2	30.656	0	0
ADCY1	30.6519	0	0
PGK1	30.6511	0	0
BAALC	30.6465	0	0
ZNF106	30.6459	0	0
SMAP1	30.6379	0	0
TMEM59	30.6361	0	0
RAB7A	30.633	0	0
NBAS	30.6298	0	0
PPFIBP1	30.6264	0	0
TMX4	30.6207	0	0
PITHD1	30.6169	0	0
WSB1	30.6102	0	0
TM2D3	30.6075	0	0
MAPRE2	30.6069	0	0
BEX5	30.6059	0	0
SLC12A5	30.5994	0	0
FAM49B	30.5959	0	0
SYBU	30.5951	0	0
CDC42	30.5933	0	0
WAC	30.5929	0	0
RPS8	30.5902	0	0
VPS13D	30.5888	0	0
CTSB	30.5749	0	0
SRGAP3	30.5645	0	0
NECAB1	30.5626	0	0
RPS19	30.5568	0	0
CLIP1	30.5488	0	0
CHGB	30.5398	0	0
RAN	30.5342	0	0
MAMDC2	30.5292	0	0
RPL8	30.5261	0	0
RAB3GAP1	30.5249	0	0
ARHGEF12	30.5155	0	0
CD47	30.5135	0	0
GSK3B	30.5096	0	0
SLC25A4	30.5069	0	0
SPOCK2	30.5064	0	0
KIAA1549L	30.4979	0	0
SORT1	30.49	0	0
ASAP1	30.4847	0	0
OSBPL8	30.4836	0	0
FARS2	30.4825	0	0
TCEB1	30.4767	0	0
ANKRD17	30.4753	0	0
INPP4A	30.4725	0	0
RAPGEF5	30.4722	0	0
FEZ1	30.4702	0	0
ANXA6	30.4698	0	0
ARHGAP44	30.4615	0	0
WDFY3	30.4599	0	0
MAP1LC3A	30.4532	0	0
HECTD4	30.4478	0	0
LMBRD1	30.4473	0	0
EDF1	30.4293	0	0
ZMYM2	30.4293	0	0
ELAVL4	30.4211	0	0
CDC27	30.418	0	0
ADD1	30.4177	0	0
CIT	30.4133	0	0
CLTB	30.4043	0	0
TCAF1	30.4026	0	0
CADPS2	30.4025	0	0
RPS27A	30.4009	0	0
SLC35F3	30.3996	0	0
PTPRA	30.3991	0	0
HSPA8	30.3969	0	0
CDC37	30.3845	0	0
RASA1	30.3818	0	0
SRPK1	30.3791	0	0
MAP2K5	30.379	0	0
GPR155	30.3765	0	0
TUBA1B	30.3763	0	0
FGFR1OP2	30.3762	0	0
KPNA6	30.3718	0	0
KCNB1	30.365	0	0
C20orf194	30.3584	0	0
ZNF609	30.3544	0	0
TIAM2	30.3426	0	0
PPP1R21	30.3412	0	0
CLSTN3	30.3351	0	0
DDAH1	30.3337	0	0
OLA1	30.3318	0	0
CLSTN2	30.3268	0	0
NUCKS1	30.3231	0	0
PRKAR2B	30.3209	0	0
ADAM22	30.3018	0	0
RPLP2	30.2963	0	0
UNC13A	30.2925	0	0
ZMYM4	30.2886	0	0
AGTPBP1	30.2869	0	0
SLC9A6	30.2815	0	0
ARHGAP21	30.2757	0	0
SCN8A	30.2756	0	0
PDS5B	30.247	0	0
SPIRE1	30.2438	0	0
VEZT	30.2412	0	0
SECISBP2L	30.2387	0	0
MOAP1	30.237	0	0
CRLF3	30.2366	0	0
NFAT5	30.2356	0	0
CAB39	30.2335	0	0
ZFR	30.2296	0	0
LARP1	30.2292	0	0
PACSIN1	30.2261	0	0
CCDC3	30.2211	0	0
EPHA4	30.2195	0	0
SV2A	30.2166	0	0
SSBP3	30.2115	0	0
NUDCD3	30.2065	0	0
TLN2	30.205	0	0
NDUFA5	30.2036	0	0
PIAS1	30.1987	0	0
BAIAP2	30.1984	0	0
PRKCZ	30.1891	0	0
UBR2	30.1867	0	0
ELAVL2	30.1811	0	0
LUZP1	30.1782	0	0
CHD6	30.1778	0	0
PPHLN1	30.1778	0	0
RPS6KC1	30.1773	0	0
SEPT3	30.1687	0	0
YWHAQ	30.1671	0	0
C11orf58	30.1644	0	0
STMN4	30.1619	0	0
LRRFIP2	30.1617	0	0
DENND1A	30.1605	0	0
SLC25A12	30.1539	0	0
GTDC1	30.1482	0	0
MNAT1	30.1405	0	0
HK1	30.1403	0	0
RFWD2	30.1396	0	0
MTURN	30.1313	0	0
TOM1L2	30.1242	0	0
KLHDC3	30.1232	0	0
EXOC6	30.1216	0	0
PIK3CA	30.1192	0	0
HSPA9	30.1151	0	0
MARK3	30.1146	0	0
MKL2	30.1091	0	0
PPA1	30.108	0	0
FBXO11	30.1039	0	0
FAM49A	30.0979	0	0
DCLK2	30.0974	0	0
SETD5	30.0897	0	0
KIAA0368	30.0859	0	0
HOOK2	30.0857	0	0
RPL3	30.0852	0	0
POU6F2	30.0824	0	0
MYL12B	30.0824	0	0
DNAJB14	30.078	0	0
CAMKK2	30.0775	0	0
PLEKHB2	30.0631	0	0
CADM3	30.0569	0	0
ITSN1	30.0561	0	0
ATP2C1	30.0502	0	0
PLEKHA6	30.049	0	0
NPTX1	30.0487	0	0

## Sheet: MAST_hurdle
Gene	Pr(>Chisq)	coef	Confidence interval high	Confidence interval low	fdr
TUBB2A	0	-7.49117	-7.43441	-7.54793	0
NGFRAP1	0	-7.45392	-7.39276	-7.51508	0
BEX1	0	-7.4267	-7.36739	-7.48601	0
NEFL	0	-7.38015	-7.32314	-7.43717	0
SOD1	0	-7.37081	-7.32104	-7.42058	0
STMN2	0	-7.3595	-7.29507	-7.42394	0
DYNLL1	0	-7.34022	-7.27737	-7.40308	0
GAP43	0	-7.31201	-7.2535	-7.37052	0
HINT1	0	-7.29051	-7.23877	-7.34224	0
MDH1	0	-7.25261	-7.19694	-7.30827	0
SEPW1	0	-7.23697	-7.17795	-7.29598	0
RAB3A	0	-7.23065	-7.17582	-7.28547	0
NDUFA4	0	-7.22279	-7.16727	-7.2783	0
NEFM	0	-7.21689	-7.166	-7.26779	0
YWHAH	0	-7.20728	-7.14389	-7.27068	0
BEX2	0	-7.16663	-7.11802	-7.21524	0
UQCRH	0	-7.15589	-7.10348	-7.20829	0
TUBA4A	0	-7.14891	-7.0988	-7.19902	0
TMSB10	0	-7.13995	-7.07477	-7.20514	0
RPL15	0	-7.09412	-7.03809	-7.15015	0
TUBA1A	0	-7.07389	-7.01836	-7.12943	0
ISCU	0	-7.0394	-6.99446	-7.08435	0
C14orf2	0	-7.03661	-6.98821	-7.08502	0
COX7C	0	-7.0287	-6.97855	-7.07884	0
SCG5	0	-6.99941	-6.94054	-7.05827	0
BEX4	0	-6.98803	-6.9402	-7.03587	0
CFL1	0	-6.98632	-6.92675	-7.04588	0
STMN1	0	-6.98001	-6.9129	-7.04711	0
TUBB4B	0	-6.96249	-6.90911	-7.01588	0
PGAM1	0	-6.96019	-6.90743	-7.01296	0
COX4I1	0	-6.92753	-6.87407	-6.98098	0
MLLT11	0	-6.91975	-6.87228	-6.96722	0
UBB	0	-6.88114	-6.8234	-6.93888	0
CHCHD10	0	-6.87216	-6.82126	-6.92306	0
ATP6AP2	0	-6.8652	-6.81823	-6.91218	0
SRSF5	0	-6.86502	-6.81735	-6.91269	0
TMSB4X	0	-6.85195	-6.78234	-6.92156	0
TAGLN3	0	-6.84829	-6.78928	-6.90729	0
SRP14	0	-6.8459	-6.79054	-6.90125	0
ATPIF1	0	-6.84281	-6.79326	-6.89237	0
TUBB	0	-6.84141	-6.78822	-6.89459	0
ATP6V1F	0	-6.82066	-6.77104	-6.87029	0
ALDOA	0	-6.82034	-6.75429	-6.8864	0
ACTG1	0	-6.81812	-6.75773	-6.8785	0
FAM153B	0	-6.79424	-6.7379	-6.85058	0
MAP2K1	0	-6.78934	-6.74037	-6.8383	0
EIF1B	0	-6.78819	-6.74184	-6.83454	0
FTH1	0	-6.77453	-6.70176	-6.8473	0
PCMT1	0	-6.76672	-6.71537	-6.81806	0
CPE	0	-6.75813	-6.69626	-6.82	0
RGS4	0	-6.74756	-6.68979	-6.80534	0
ATP6V1A	0	-6.74283	-6.69058	-6.79509	0
MGST3	0	-6.73944	-6.68758	-6.79131	0
ATP6V1B2	0	-6.73387	-6.67902	-6.78872	0
SNCA	0	-6.72933	-6.66361	-6.79506	0
COX6B1	0	-6.72466	-6.67743	-6.7719	0
RAC1	0	-6.72396	-6.66826	-6.77967	0
APOO	0	-6.72043	-6.66659	-6.77426	0
ARL6IP5	0	-6.71948	-6.66593	-6.77302	0
TPI1	0	-6.71759	-6.65942	-6.77576	0
CREG2	0	-6.71106	-6.64922	-6.7729	0
PDXDC1	0	-6.70748	-6.65356	-6.76141	0
ATP1A1	0	-6.70561	-6.64453	-6.76669	0
MTCH1	0	-6.70299	-6.64561	-6.76036	0
CCDC85B	0	-6.6986	-6.64568	-6.75152	0
ATP5J	0	-6.69841	-6.65575	-6.74107	0
COX5B	0	-6.6962	-6.64868	-6.74372	0
UBC	0	-6.68373	-6.62239	-6.74508	0
VDAC3	0	-6.67769	-6.62908	-6.7263	0
ATP5G3	0	-6.6659	-6.62024	-6.71156	0
ATP6V1D	0	-6.66143	-6.61748	-6.70537	0
SKP1	0	-6.65912	-6.6015	-6.71673	0
SNCB	0	-6.65896	-6.60491	-6.71302	0
EID1	0	-6.65056	-6.59438	-6.70674	0
GPX4	0	-6.64914	-6.59609	-6.70219	0
LDHB	0	-6.64623	-6.59247	-6.69998	0
CISD1	0	-6.63722	-6.5878	-6.68665	0
PAK1	0	-6.63523	-6.57868	-6.69179	0
HSP90AA1	0	-6.61971	-6.54492	-6.6945	0
SUB1	0	-6.61767	-6.567	-6.66834	0
RPS14	0	-6.61059	-6.56364	-6.65754	0
APLP2	0	-6.60673	-6.55102	-6.66243	0
COX6C	0	-6.60292	-6.55721	-6.64863	0
RPL13	0	-6.59737	-6.53984	-6.65491	0
RPS15	0	-6.59708	-6.53805	-6.65611	0
TPT1	0	-6.59458	-6.54333	-6.64582	0
DYNC1H1	0	-6.59398	-6.53379	-6.65418	0
OCIAD1	0	-6.58973	-6.53253	-6.64694	0
ITM2B	0	-6.58729	-6.5244	-6.65017	0
GUK1	0	-6.58609	-6.53377	-6.63841	0
ATL1	0	-6.58347	-6.52578	-6.64117	0
NDUFS5	0	-6.58269	-6.5346	-6.63079	0
CYCS	0	-6.58104	-6.53461	-6.62747	0
GOT1	0	-6.57966	-6.53177	-6.62754	0
FLOT1	0	-6.57815	-6.52748	-6.62882	0
ATP6V1H	0	-6.57666	-6.51998	-6.63334	0
FAM127A	0	-6.57231	-6.52167	-6.62295	0
PPIA	0	-6.57063	-6.50436	-6.63689	0
CCNI	0	-6.56748	-6.50622	-6.62873	0
ATP5L	0	-6.56643	-6.51889	-6.61396	0
CLTC	0	-6.56277	-6.50785	-6.61769	0
REEP5	0	-6.56268	-6.51006	-6.61529	0
DSTN	0	-6.55604	-6.50422	-6.60785	0
ENO1	0	-6.55358	-6.50173	-6.60542	0
CLTA	0	-6.55346	-6.50373	-6.60319	0
DYNLRB1	0	-6.55134	-6.49688	-6.60581	0
RPL7A	0	-6.54169	-6.49609	-6.5873	0
VDAC1	0	-6.54109	-6.49206	-6.59012	0
SLC25A3	0	-6.54028	-6.48732	-6.59325	0
ACOT7	0	-6.53772	-6.48748	-6.58795	0
TMA7	0	-6.53464	-6.48405	-6.58523	0
FAM153C	0	-6.53157	-6.48013	-6.58301	0
SARAF	0	-6.52811	-6.46287	-6.59334	0
EEF1A1	0	-6.52706	-6.47083	-6.58328	0
SEC62	0	-6.52662	-6.4669	-6.58634	0
TSPAN7	0	-6.52461	-6.45823	-6.59099	0
RAB11A	0	-6.5206	-6.46562	-6.57558	0
DDX5	0	-6.51813	-6.46491	-6.57135	0
ITM2C	0	-6.51318	-6.46141	-6.56495	0
UQCR10	0	-6.51085	-6.46162	-6.56008	0
CHCHD2	0	-6.50742	-6.45865	-6.55619	0
PDP1	0	-6.50389	-6.44927	-6.55851	0
TCEAL2	0	-6.50186	-6.45199	-6.55174	0
SNX3	0	-6.50042	-6.44985	-6.551	0
TUBB4A	0	-6.49935	-6.4505	-6.54821	0
RPSA	0	-6.49494	-6.4454	-6.54448	0
PEBP1	0	-6.49472	-6.42226	-6.56718	0
RPL13A	0	-6.48803	-6.43618	-6.53987	0
RHEB	0	-6.48727	-6.4399	-6.53465	0
TXNRD1	0	-6.47574	-6.42031	-6.53117	0
SLC39A10	0	-6.47392	-6.41519	-6.53266	0
RPL10	0	-6.47349	-6.42283	-6.52415	0
FAM213A	0	-6.47046	-6.41898	-6.52194	0
ARF1	0	-6.46786	-6.40968	-6.52604	0
ID2	0	-6.46691	-6.41091	-6.52292	0
PCSK1N	0	-6.45862	-6.38939	-6.52786	0
PSMA7	0	-6.45469	-6.40827	-6.50111	0
NAPB	0	-6.45196	-6.3924	-6.51152	0
RPL6	0	-6.44157	-6.39097	-6.49217	0
HSPH1	0	-6.4379	-6.37958	-6.49621	0
ATP2A2	0	-6.43737	-6.37883	-6.49592	0
RABAC1	0	-6.43519	-6.38624	-6.48415	0
EIF5	0	-6.43421	-6.385	-6.48342	0
LDHA	0	-6.43421	-6.38431	-6.4841	0
PLEKHA1	0	-6.43175	-6.37308	-6.49042	0
ACTR2	0	-6.42607	-6.37371	-6.47843	0
NRN1	0	-6.42113	-6.37283	-6.46944	0
SV2B	0	-6.42073	-6.35483	-6.48663	0
BRK1	0	-6.41955	-6.37224	-6.46685	0
TMEM59L	0	-6.41872	-6.35334	-6.4841	0
CCK	0	-6.41607	-6.34031	-6.49183	0
EIF1AX	0	-6.4153	-6.36001	-6.47059	0
C9orf16	0	-6.41292	-6.36083	-6.46501	0
GNG3	0	-6.41117	-6.35693	-6.4654	0
SNX10	0	-6.40889	-6.35699	-6.46079	0
KCNAB2	0	-6.40501	-6.34994	-6.46008	0
VPS35	0	-6.40443	-6.35272	-6.45614	0
GABARAPL2	0	-6.40257	-6.34966	-6.45547	0
GHITM	0	-6.40238	-6.35028	-6.45448	0
ATP5B	0	-6.40155	-6.34595	-6.45715	0
KIFAP3	0	-6.39877	-6.34216	-6.45539	0
TBCA	0	-6.39877	-6.34788	-6.44965	0
YWHAB	0	-6.39797	-6.32936	-6.46657	0
MORF4L2	0	-6.39767	-6.34244	-6.45289	0
THY1	0	-6.39764	-6.32772	-6.46755	0
TBRG1	0	-6.39372	-6.34318	-6.44427	0
FTL	0	-6.39119	-6.32481	-6.45757	0
FAM134B	0	-6.39068	-6.33727	-6.4441	0
ATP6V0E2	0	-6.39033	-6.33861	-6.44205	0
NCOA7	0	-6.38815	-6.33102	-6.44529	0
KIF3A	0	-6.38472	-6.32723	-6.44222	0
NDFIP1	0	-6.38275	-6.31677	-6.44872	0
PAFAH1B1	0	-6.38011	-6.31952	-6.44069	0
ATP6V1E1	0	-6.3748	-6.31848	-6.43112	0
C16orf45	0	-6.37294	-6.31405	-6.43182	0
EIF4A2	0	-6.36914	-6.29992	-6.43835	0
RAPH1	0	-6.35492	-6.30394	-6.4059	0
YWHAZ	0	-6.34978	-6.28832	-6.41125	0
FKBP8	0	-6.34956	-6.29248	-6.40663	0
NAP1L1	0	-6.34674	-6.28524	-6.40824	0
TMOD2	0	-6.34476	-6.28898	-6.40054	0
PDE5A	0	-6.34	-6.29425	-6.38576	0
CLU	0	-6.33938	-6.2664	-6.41236	0
SERINC1	0	-6.32684	-6.26264	-6.39103	0
PRKAR1A	0	-6.32344	-6.27104	-6.37584	0
MRPS21	0	-6.31891	-6.27117	-6.36666	0
CES4A	0	-6.31521	-6.27102	-6.35939	0
UBE2B	0	-6.31247	-6.25603	-6.36891	0
RPL14	0	-6.3068	-6.25276	-6.36085	0
CHGA	0	-6.30657	-6.24331	-6.36984	0
TAX1BP1	0	-6.30571	-6.24971	-6.3617	0
RAB6B	0	-6.30407	-6.24266	-6.36549	0
ATP1A3	0	-6.30285	-6.246	-6.3597	0
KIAA1211L	0	-6.29939	-6.23963	-6.35915	0
CAMK2G	0	-6.29849	-6.2371	-6.35989	0
UBE2V2	0	-6.29217	-6.24423	-6.3401	0
RPS2	0	-6.28925	-6.23567	-6.34284	0
ATP5A1	0	-6.27942	-6.22589	-6.33294	0
RNPS1	0	-6.27876	-6.22859	-6.32892	0
CALM3	0	-6.27793	-6.2056	-6.35025	0
UQCRHL	0	-6.27706	-6.23595	-6.31818	0
GABBR1	0	-6.27429	-6.22336	-6.32521	0
ACSL3	0	-6.27357	-6.21663	-6.33052	0
PJA2	0	-6.27098	-6.20727	-6.33469	0
SEPT11	0	-6.27004	-6.21414	-6.32594	0
DCAF6	0	-6.26713	-6.21217	-6.3221	0
PINK1	0	-6.26611	-6.22061	-6.31161	0
MRFAP1	0	-6.26283	-6.21397	-6.31169	0
TMEM160	0	-6.25586	-6.20233	-6.3094	0
UGP2	0	-6.25415	-6.20322	-6.30508	0
NLRP1	0	-6.25219	-6.19934	-6.30504	0
SH3GL2	0	-6.25196	-6.18369	-6.32023	0
RAB1A	0	-6.24928	-6.20096	-6.2976	0
SYP	0	-6.24835	-6.18236	-6.31434	0
EIF1	0	-6.24817	-6.18276	-6.31358	0
UQCRB	0	-6.24613	-6.1933	-6.29896	0
RPL7	0	-6.24369	-6.18969	-6.29768	0
RUNDC3A	0	-6.24166	-6.18602	-6.29729	0
PRUNE2	0	-6.23899	-6.18283	-6.29514	0
LYNX1	0	-6.23877	-6.18713	-6.29042	0
ENC1	0	-6.23685	-6.16275	-6.31095	0
RPS25	0	-6.23445	-6.18229	-6.2866	0
STMN3	0	-6.23437	-6.17446	-6.29429	0
YWHAG	0	-6.23306	-6.16321	-6.3029	0
KCNK1	0	-6.23055	-6.17326	-6.28784	0
GNB1	0	-6.23029	-6.16947	-6.29111	0
NRG1	0	-6.22282	-6.14381	-6.30184	0
MORF4L1	0	-6.21675	-6.15694	-6.27657	0
KLC1	0	-6.21573	-6.14922	-6.28225	0
RPLP1	0	-6.21369	-6.1605	-6.26688	0
TMEM14A	0	-6.21314	-6.16466	-6.26162	0
RPS7	0	-6.21223	-6.16642	-6.25804	0
GABARAPL1	0	-6.21136	-6.16163	-6.26109	0
PAPSS1	0	-6.21022	-6.15828	-6.26216	0
RPL35A	0	-6.20664	-6.15735	-6.25593	0
AP3S1	0	-6.20243	-6.15548	-6.24937	0
RAB6A	0	-6.20062	-6.14309	-6.25815	0
NIN	0	-6.19968	-6.13977	-6.2596	0
TSPAN13	0	-6.19968	-6.14949	-6.24987	0
SNU13	0	-6.19724	-6.14464	-6.24984	0
AMBRA1	0	-6.19138	-6.13593	-6.24683	0
SEZ6L2	0	-6.18892	-6.1292	-6.24864	0
DIRAS2	0	-6.18522	-6.12588	-6.24457	0
SULT4A1	0	-6.18495	-6.12551	-6.2444	0
OPTN	0	-6.18417	-6.13584	-6.2325	0
PIN1	0	-6.17946	-6.12313	-6.2358	0
APLP1	0	-6.17674	-6.11086	-6.24262	0
CHCHD3	0	-6.17534	-6.11705	-6.23364	0
TACC1	0	-6.17275	-6.11581	-6.22968	0
RPL29	0	-6.17189	-6.11982	-6.22395	0
BSN	0	-6.169	-6.11002	-6.22798	0
SPCS1	0	-6.16852	-6.1203	-6.21674	0
SAT2	0	-6.16809	-6.12223	-6.21395	0
MICAL2	0	-6.1677	-6.10893	-6.22647	0
TTC1	0	-6.16537	-6.11743	-6.21332	0
ATP6V0B	0	-6.16513	-6.10807	-6.22219	0
RPL28	0	-6.16212	-6.10732	-6.21691	0
SAP18	0	-6.15953	-6.11066	-6.2084	0
HMGN3	0	-6.158	-6.10426	-6.21175	0
DDX24	0	-6.15734	-6.09436	-6.22033	0
SERF2	0	-6.1555	-6.10199	-6.20902	0
CEND1	0	-6.15542	-6.09246	-6.21839	0
ATP6V1G1	0	-6.15401	-6.10293	-6.20508	0
FEZ2	0	-6.15154	-6.09729	-6.2058	0
HACD3	0	-6.15062	-6.09988	-6.20136	0
PGRMC1	0	-6.14898	-6.0924	-6.20556	0
GABRA1	0	-6.14825	-6.08272	-6.21378	0
CKB	0	-6.14314	-6.06778	-6.2185	0
WBP2	0	-6.14105	-6.08566	-6.19644	0
MYH10	0	-6.13755	-6.0778	-6.19731	0
BNIP3	0	-6.1341	-6.08079	-6.18741	0
ATP6V1C1	0	-6.13285	-6.0822	-6.1835	0
UCHL1	0	-6.13066	-6.05543	-6.2059	0
NGEF	0	-6.12791	-6.07125	-6.18457	0
PPP1R12A	0	-6.1264	-6.06398	-6.18883	0
BTF3	0	-6.12588	-6.07814	-6.17362	0
PGM2L1	0	-6.12536	-6.06635	-6.18438	0
BNIP3L	0	-6.12463	-6.06577	-6.1835	0
WASF1	0	-6.12347	-6.06118	-6.18576	0
CHGB	0	-6.12295	-6.0744	-6.17151	0
PPP3CB	0	-6.1189	-6.06097	-6.17683	0
SCOC	0	-6.1183	-6.06807	-6.16853	0
BCAP29	0	-6.11587	-6.0631	-6.16865	0
C11orf49	0	-6.11191	-6.05444	-6.16938	0
MAP2K4	0	-6.11082	-6.05055	-6.17108	0
PSAP	0	-6.1066	-6.03537	-6.17782	0
FAM134A	0	-6.10616	-6.05874	-6.15357	0
CAPZA2	0	-6.10572	-6.0553	-6.15614	0
RPL19	0	-6.1043	-6.05223	-6.15637	0
PRKAG2	0	-6.10426	-6.04553	-6.163	0
FOCAD	0	-6.1029	-6.03755	-6.16824	0
HNRNPDL	0	-6.10251	-6.04445	-6.16057	0
KIAA0930	0	-6.10185	-6.04142	-6.16227	0
RSRP1	0	-6.10131	-6.04667	-6.15595	0
TOMM20	0	-6.09825	-6.03825	-6.15825	0
BEX5	0	-6.09755	-6.04972	-6.14538	0
KIF21A	0	-6.09714	-6.03453	-6.15976	0
DPYSL2	0	-6.09629	-6.02628	-6.16631	0
SOD2	0	-6.09481	-6.04448	-6.14514	0
VAPA	0	-6.0947	-6.04068	-6.14873	0
MGEA5	0	-6.09398	-6.03441	-6.15354	0
KIF5A	0	-6.09379	-6.03792	-6.14967	0
ELMO1	0	-6.09117	-6.03266	-6.14968	0
SYNJ1	0	-6.0909	-6.03896	-6.14285	0
PPM1K	0	-6.08983	-6.03381	-6.14586	0
NAP1L2	0	-6.08932	-6.03707	-6.14157	0
ETS2	0	-6.08925	-6.04526	-6.13324	0
TCF25	0	-6.08832	-6.02889	-6.14775	0
HSPA8	0	-6.08812	-6.03316	-6.14307	0
NDUFS1	0	-6.08811	-6.03358	-6.14264	0
PEA15	0	-6.08562	-6.02852	-6.14271	0
UBE2D3	0	-6.08196	-6.02749	-6.13644	0
SEPT7	0	-6.0817	-6.01418	-6.14922	0
ARHGEF9	0	-6.07897	-6.02382	-6.13412	0
KIF1A	0	-6.07381	-6.01082	-6.13679	0
COX7A2L	0	-6.07344	-6.02082	-6.12607	0
AKAP13	0	-6.07236	-6.02245	-6.12228	0
ACYP2	0	-6.07193	-6.01236	-6.1315	0
CAP2	0	-6.07035	-6.00688	-6.13381	0
UQCRC2	0	-6.0699	-6.01967	-6.12013	0
ARHGEF3	0	-6.06974	-6.01221	-6.12727	0
RPL8	0	-6.06967	-6.01828	-6.12105	0
GLRB	0	-6.06912	-6.01597	-6.12226	0
TCEB1	0	-6.06791	-6.02321	-6.11262	0
HOMER1	0	-6.06678	-6.00724	-6.12632	0
RABGAP1	0	-6.06618	-6.00776	-6.12461	0
RAN	0	-6.06425	-6.01239	-6.11611	0
DNAJC6	0	-6.06417	-6.00192	-6.12643	0
H2AFZ	0	-6.06306	-6.01231	-6.11381	0
B4GAT1	0	-6.06293	-6.00865	-6.11721	0
AP2S1	0	-6.06216	-6.0113	-6.11302	0
RHBDD2	0	-6.06176	-6.00055	-6.12298	0
RPL34	0	-6.06135	-6.00996	-6.11273	0
CA11	0	-6.05661	-6.00003	-6.11318	0
TMEM59	0	-6.05599	-6.00876	-6.10322	0
NRD1	0	-6.05434	-6.00007	-6.10862	0
CSNK1A1	0	-6.05419	-5.9983	-6.11008	0
PITHD1	0	-6.054	-6.00401	-6.10399	0
TM2D3	0	-6.05212	-6.00336	-6.10087	0
PGK1	0	-6.05151	-5.99961	-6.10341	0
APBA2	0	-6.05052	-5.99135	-6.10968	0
VPS41	0	-6.04985	-6.00003	-6.09967	0
ENO2	0	-6.04821	-5.97746	-6.11896	0
SERINC3	0	-6.04756	-5.98746	-6.10767	0
GABRG2	0	-6.04686	-5.98282	-6.1109	0
HOPX	0	-6.04629	-5.98822	-6.10436	0
KDM5B	0	-6.04577	-5.99215	-6.09938	0
SLC25A6	0	-6.04265	-5.98969	-6.09561	0
RPL32	0	-6.04263	-5.98533	-6.09992	0
MYO1D	0	-6.0412	-5.98075	-6.10166	0
PTMA	0	-6.03758	-5.97505	-6.10011	0
NDRG4	0	-6.03457	-5.96372	-6.10542	0
GLS	0	-6.0317	-5.96726	-6.09613	0
GRINA	0	-6.0281	-5.97842	-6.07777	0
MTDH	0	-6.02775	-5.97284	-6.08266	0
FAM126B	0	-6.02749	-5.96971	-6.08528	0
UBE3A	0	-6.02712	-5.97364	-6.08061	0
SPATS2	0	-6.02671	-5.97266	-6.08076	0
MAP1LC3A	0	-6.02467	-5.97588	-6.07346	0
RPL3	0	-6.02448	-5.97712	-6.07184	0
SLC25A4	0	-6.02302	-5.9692	-6.07685	0
RPS8	0	-6.02275	-5.97099	-6.07451	0
LONRF2	0	-6.02173	-5.96107	-6.08238	0
NUDT3	0	-6.0191	-5.95815	-6.08006	0
OSBPL1A	0	-6.01826	-5.95632	-6.0802	0
HMGB1	0	-6.01711	-5.95185	-6.08237	0
BAALC	0	-6.01348	-5.95946	-6.06751	0
ZNF483	0	-6.01106	-5.95051	-6.07162	0
DNAJB6	0	-6.01065	-5.95227	-6.06903	0
MOAP1	0	-6.00904	-5.95877	-6.05931	0
CRLF3	0	-6.00808	-5.95726	-6.05891	0
LMO4	0	-6.00752	-5.93543	-6.07961	0
ATP9A	0	-6.00343	-5.94276	-6.06409	0
PGBD5	0	-6.00216	-5.94417	-6.06016	0
HSPA12A	0	-6.00081	-5.94487	-6.05674	0

## Sheet: intersect
Gene	Pr(>Chisq) (MAST)	coef (MAST)	Confidence interval high (MAST)	Confidence interval low (MAST)	fdr (MAST)	emd (SigEmd)	pvalue (SigEmd)	padjust (SigEmd)
NGFRAP1	0	-7.45392	-7.39276	-7.51508	0	37.7923	0	0
TUBB2A	0	-7.49117	-7.43441	-7.54793	0	37.6753	0	0
BEX1	0	-7.4267	-7.36739	-7.48601	0	37.5221	0	0
NEFL	0	-7.38015	-7.32314	-7.43717	0	37.3356	0	0
STMN2	0	-7.3595	-7.29507	-7.42394	0	37.1809	0	0
SOD1	0	-7.37081	-7.32104	-7.42058	0	37.0941	0	0
DYNLL1	0	-7.34022	-7.27737	-7.40308	0	37.0847	0	0
GAP43	0	-7.31201	-7.2535	-7.37052	0	36.7252	0	0
HINT1	0	-7.29051	-7.23877	-7.34224	0	36.6829	0	0
SEPW1	0	-7.23697	-7.17795	-7.29598	0	36.6783	0	0
YWHAH	0	-7.20728	-7.14389	-7.27068	0	36.4544	0	0
NDUFA4	0	-7.22279	-7.16727	-7.2783	0	36.3678	0	0
UQCRH	0	-7.15589	-7.10348	-7.20829	0	36.3123	0	0
NEFM	0	-7.21689	-7.166	-7.26779	0	36.2828	0	0
BEX2	0	-7.16663	-7.11802	-7.21524	0	36.1092	0	0
TUBA4A	0	-7.14891	-7.0988	-7.19902	0	35.9145	0	0
SCG5	0	-6.99941	-6.94054	-7.05827	0	35.6375	0	0
COX7C	0	-7.0287	-6.97855	-7.07884	0	35.4739	0	0
C14orf2	0	-7.03661	-6.98821	-7.08502	0	35.3829	0	0
ISCU	0	-7.0394	-6.99446	-7.08435	0	35.2321	0	0
TUBB4B	0	-6.96249	-6.90911	-7.01588	0	35.1676	0	0
BEX4	0	-6.98803	-6.9402	-7.03587	0	35.1443	0	0
TMSB4X	0	-6.85195	-6.78234	-6.92156	0	34.9681	0	0
ALDOA	0	-6.82034	-6.75429	-6.8864	0	34.7956	0	0
MLLT11	0	-6.91975	-6.87228	-6.96722	0	34.7636	0	0
SRP14	0	-6.8459	-6.79054	-6.90125	0	34.6534	0	0
FTH1	0	-6.77453	-6.70176	-6.8473	0	34.6463	0	0
ATP6AP2	0	-6.8652	-6.81823	-6.91218	0	34.6326	0	0
SRSF5	0	-6.86502	-6.81735	-6.91269	0	34.5684	0	0
ATPIF1	0	-6.84281	-6.79326	-6.89237	0	34.5505	0	0
ATP1A1	0	-6.70561	-6.64453	-6.76669	0	34.4608	0	0
MTCH1	0	-6.70299	-6.64561	-6.76036	0	34.3887	0	0
PCMT1	0	-6.76672	-6.71537	-6.81806	0	34.3504	0	0
CREG2	0	-6.71106	-6.64922	-6.7729	0	34.331	0	0
ATP6V1F	0	-6.82066	-6.77104	-6.87029	0	34.3191	0	0
RGS4	0	-6.74756	-6.68979	-6.80534	0	34.22	0	0
SNCA	0	-6.72933	-6.66361	-6.79506	0	34.2034	0	0
FAM153B	0	-6.79424	-6.7379	-6.85058	0	34.1869	0	0
TPI1	0	-6.71759	-6.65942	-6.77576	0	34.1411	0	0
MGST3	0	-6.73944	-6.68758	-6.79131	0	34.1384	0	0
DYNC1H1	0	-6.59398	-6.53379	-6.65418	0	34.1174	0	0
SKP1	0	-6.65912	-6.6015	-6.71673	0	34.0732	0	0
APOO	0	-6.72043	-6.66659	-6.77426	0	34.0375	0	0
HSP90AA1	0	-6.61971	-6.54492	-6.6945	0	33.985	0	0
UBC	0	-6.68373	-6.62239	-6.74508	0	33.9837	0	0
ATL1	0	-6.58347	-6.52578	-6.64117	0	33.9695	0	0
EID1	0	-6.65056	-6.59438	-6.70674	0	33.9561	0	0
PDXDC1	0	-6.70748	-6.65356	-6.76141	0	33.896	0	0
PAK1	0	-6.63523	-6.57868	-6.69179	0	33.8491	0	0
OCIAD1	0	-6.58973	-6.53253	-6.64694	0	33.8393	0	0
APLP2	0	-6.60673	-6.55102	-6.66243	0	33.8284	0	0
PPIA	0	-6.57063	-6.50436	-6.63689	0	33.8123	0	0
SNCB	0	-6.65896	-6.60491	-6.71302	0	33.8117	0	0
VDAC3	0	-6.67769	-6.62908	-6.7263	0	33.7961	0	0
GPX4	0	-6.64914	-6.59609	-6.70219	0	33.7875	0	0
SEC62	0	-6.52662	-6.4669	-6.58634	0	33.7776	0	0
TSPAN7	0	-6.52461	-6.45823	-6.59099	0	33.7417	0	0
ITM2B	0	-6.58729	-6.5244	-6.65017	0	33.7101	0	0
RPS15	0	-6.59708	-6.53805	-6.65611	0	33.7053	0	0
CLTC	0	-6.56277	-6.50785	-6.61769	0	33.6873	0	0
ATP6V1H	0	-6.57666	-6.51998	-6.63334	0	33.6577	0	0
RPL13	0	-6.59737	-6.53984	-6.65491	0	33.6175	0	0
SUB1	0	-6.61767	-6.567	-6.66834	0	33.5865	0	0
CCNI	0	-6.56748	-6.50622	-6.62873	0	33.5815	0	0
FLOT1	0	-6.57815	-6.52748	-6.62882	0	33.5642	0	0
REEP5	0	-6.56268	-6.51006	-6.61529	0	33.5393	0	0
GUK1	0	-6.58609	-6.53377	-6.63841	0	33.5207	0	0
CISD1	0	-6.63722	-6.5878	-6.68665	0	33.5201	0	0
ATP5J	0	-6.69841	-6.65575	-6.74107	0	33.5196	0	0
LDHB	0	-6.64623	-6.59247	-6.69998	0	33.4944	0	0
ATP6V1D	0	-6.66143	-6.61748	-6.70537	0	33.4746	0	0
TPT1	0	-6.59458	-6.54333	-6.64582	0	33.456	0	0
RAB11A	0	-6.5206	-6.46562	-6.57558	0	33.4484	0	0
ACOT7	0	-6.53772	-6.48748	-6.58795	0	33.4158	0	0
ARF1	0	-6.46786	-6.40968	-6.52604	0	33.3847	0	0
DDX5	0	-6.51813	-6.46491	-6.57135	0	33.3813	0	0
ATP5G3	0	-6.6659	-6.62024	-6.71156	0	33.3765	0	0
DYNLRB1	0	-6.55134	-6.49688	-6.60581	0	33.3623	0	0
SV2B	0	-6.42073	-6.35483	-6.48663	0	33.3414	0	0
DSTN	0	-6.55604	-6.50422	-6.60785	0	33.3374	0	0
SLC39A10	0	-6.47392	-6.41519	-6.53266	0	33.3372	0	0
TMEM59L	0	-6.41872	-6.35334	-6.4841	0	33.3347	0	0
PEBP1	0	-6.49472	-6.42226	-6.56718	0	33.314	0	0
ATP2A2	0	-6.43737	-6.37883	-6.49592	0	33.2964	0	0
TMA7	0	-6.53464	-6.48405	-6.58523	0	33.2904	0	0
PAFAH1B1	0	-6.38011	-6.31952	-6.44069	0	33.2819	0	0
ATP5L	0	-6.56643	-6.51889	-6.61396	0	33.2405	0	0
PDP1	0	-6.50389	-6.44927	-6.55851	0	33.229	0	0
CLTA	0	-6.55346	-6.50373	-6.60319	0	33.2196	0	0
THY1	0	-6.39764	-6.32772	-6.46755	0	33.217	0	0
COX6C	0	-6.60292	-6.55721	-6.64863	0	33.2096	0	0
HSPH1	0	-6.4379	-6.37958	-6.49621	0	33.2076	0	0
GOT1	0	-6.57966	-6.53177	-6.62754	0	33.2061	0	0
RPS14	0	-6.61059	-6.56364	-6.65754	0	33.204	0	0
NDFIP1	0	-6.38275	-6.31677	-6.44872	0	33.1783	0	0
PLEKHA1	0	-6.43175	-6.37308	-6.49042	0	33.1704	0	0
KIF3A	0	-6.38472	-6.32723	-6.44222	0	33.1652	0	0
FTL	0	-6.39119	-6.32481	-6.45757	0	33.1635	0	0
SLC25A3	0	-6.54028	-6.48732	-6.59325	0	33.1499	0	0
EEF1A1	0	-6.52706	-6.47083	-6.58328	0	33.1164	0	0
SERINC1	0	-6.32684	-6.26264	-6.39103	0	33.0746	0	0
YWHAB	0	-6.39797	-6.32936	-6.46657	0	33.0698	0	0
TXNRD1	0	-6.47574	-6.42031	-6.53117	0	33.0405	0	0
KIFAP3	0	-6.39877	-6.34216	-6.45539	0	33.0403	0	0
CYCS	0	-6.58104	-6.53461	-6.62747	0	33.0329	0	0
SNX3	0	-6.50042	-6.44985	-6.551	0	33.0029	0	0
NCOA7	0	-6.38815	-6.33102	-6.44529	0	32.9983	0	0
YWHAZ	0	-6.34978	-6.28832	-6.41125	0	32.9734	0	0
RPL13A	0	-6.48803	-6.43618	-6.53987	0	32.9571	0	0
VPS35	0	-6.40443	-6.35272	-6.45614	0	32.9403	0	0
C16orf45	0	-6.37294	-6.31405	-6.43182	0	32.9129	0	0
NAP1L1	0	-6.34674	-6.28524	-6.40824	0	32.9078	0	0
ACTR2	0	-6.42607	-6.37371	-6.47843	0	32.8983	0	0
EIF4A2	0	-6.36914	-6.29992	-6.43835	0	32.8712	0	0
RHEB	0	-6.48727	-6.4399	-6.53465	0	32.8538	0	0
RPL7A	0	-6.54169	-6.49609	-6.5873	0	32.8294	0	0
MORF4L2	0	-6.39767	-6.34244	-6.45289	0	32.8079	0	0
FAM134B	0	-6.39068	-6.33727	-6.4441	0	32.8018	0	0
TUBB4A	0	-6.49935	-6.4505	-6.54821	0	32.7979	0	0
TMOD2	0	-6.34476	-6.28898	-6.40054	0	32.7842	0	0
TBCA	0	-6.39877	-6.34788	-6.44965	0	32.7823	0	0
RPSA	0	-6.49494	-6.4454	-6.54448	0	32.7823	0	0
FAM153C	0	-6.53157	-6.48013	-6.58301	0	32.7752	0	0
STMN3	0	-6.23437	-6.17446	-6.29429	0	32.7652	0	0
FAM213A	0	-6.47046	-6.41898	-6.52194	0	32.7528	0	0
SNX10	0	-6.40889	-6.35699	-6.46079	0	32.7498	0	0
PJA2	0	-6.27098	-6.20727	-6.33469	0	32.7468	0	0
TCEAL2	0	-6.50186	-6.45199	-6.55174	0	32.74	0	0
CCK	0	-6.41607	-6.34031	-6.49183	0	32.7303	0	0
CHCHD2	0	-6.50742	-6.45865	-6.55619	0	32.7237	0	0
UBE2B	0	-6.31247	-6.25603	-6.36891	0	32.703	0	0
ATP6V1E1	0	-6.3748	-6.31848	-6.43112	0	32.6604	0	0
TBRG1	0	-6.39372	-6.34318	-6.44427	0	32.6562	0	0
CALM3	0	-6.27793	-6.2056	-6.35025	0	32.6537	0	0
TAX1BP1	0	-6.30571	-6.24971	-6.3617	0	32.6482	0	0
KIAA1211L	0	-6.29939	-6.23963	-6.35915	0	32.6178	0	0
GHITM	0	-6.40238	-6.35028	-6.45448	0	32.6125	0	0
SYP	0	-6.24835	-6.18236	-6.31434	0	32.61	0	0
CLU	0	-6.33938	-6.2664	-6.41236	0	32.6093	0	0
SH3GL2	0	-6.25196	-6.18369	-6.32023	0	32.6053	0	0
ENC1	0	-6.23685	-6.16275	-6.31095	0	32.6014	0	0
ID2	0	-6.46691	-6.41091	-6.52292	0	32.591	0	0
RPL10	0	-6.47349	-6.42283	-6.52415	0	32.5891	0	0
EIF5	0	-6.43421	-6.385	-6.48342	0	32.5793	0	0
C9orf16	0	-6.41292	-6.36083	-6.46501	0	32.5789	0	0
GNB1	0	-6.23029	-6.16947	-6.29111	0	32.5737	0	0
YWHAG	0	-6.23306	-6.16321	-6.3029	0	32.5726	0	0
ACSL3	0	-6.27357	-6.21663	-6.33052	0	32.5543	0	0
GNG3	0	-6.41117	-6.35693	-6.4654	0	32.5207	0	0
CAMK2G	0	-6.29849	-6.2371	-6.35989	0	32.4931	0	0
ATP1A3	0	-6.30285	-6.246	-6.3597	0	32.4811	0	0
FKBP8	0	-6.34956	-6.29248	-6.40663	0	32.4766	0	0
SEPT11	0	-6.27004	-6.21414	-6.32594	0	32.4664	0	0
RABAC1	0	-6.43519	-6.38624	-6.48415	0	32.4075	0	0
PRKAR1A	0	-6.32344	-6.27104	-6.37584	0	32.3853	0	0
SULT4A1	0	-6.18495	-6.12551	-6.2444	0	32.3745	0	0
CHGA	0	-6.30657	-6.24331	-6.36984	0	32.3741	0	0
LDHA	0	-6.43421	-6.38431	-6.4841	0	32.3711	0	0
DCAF6	0	-6.26713	-6.21217	-6.3221	0	32.3696	0	0
BRK1	0	-6.41955	-6.37224	-6.46685	0	32.3645	0	0
RAB6A	0	-6.20062	-6.14309	-6.25815	0	32.334	0	0
RPL6	0	-6.44157	-6.39097	-6.49217	0	32.3147	0	0
SEZ6L2	0	-6.18892	-6.1292	-6.24864	0	32.2969	0	0
PSMA7	0	-6.45469	-6.40827	-6.50111	0	32.2807	0	0
RPL14	0	-6.3068	-6.25276	-6.36085	0	32.2466	0	0
GABARAPL2	0	-6.40257	-6.34966	-6.45547	0	32.2427	0	0
GABRA1	0	-6.14825	-6.08272	-6.21378	0	32.2106	0	0
NRN1	0	-6.42113	-6.37283	-6.46944	0	32.1892	0	0
NRG1	0	-6.22282	-6.14381	-6.30184	0	32.1876	0	0
RAPH1	0	-6.35492	-6.30394	-6.4059	0	32.1796	0	0
PSAP	0	-6.1066	-6.03537	-6.17782	0	32.1717	0	0
RNPS1	0	-6.27876	-6.22859	-6.32892	0	32.1675	0	0
MYH10	0	-6.13755	-6.0778	-6.19731	0	32.1392	0	0
GABBR1	0	-6.27429	-6.22336	-6.32521	0	32.1324	0	0
AMBRA1	0	-6.19138	-6.13593	-6.24683	0	32.1195	0	0
TACC1	0	-6.17275	-6.11581	-6.22968	0	32.1086	0	0
MAP2K4	0	-6.11082	-6.05055	-6.17108	0	32.1026	0	0
NIN	0	-6.19968	-6.13977	-6.2596	0	32.098	0	0
DDX24	0	-6.15734	-6.09436	-6.22033	0	32.0888	0	0
KIF21A	0	-6.09714	-6.03453	-6.15976	0	32.0548	0	0
PPP1R12A	0	-6.1264	-6.06398	-6.18883	0	32.0482	0	0
DPYSL2	0	-6.09629	-6.02628	-6.16631	0	32.044	0	0
PPP3CB	0	-6.1189	-6.06097	-6.17683	0	32.0411	0	0
DNAJC6	0	-6.06417	-6.00192	-6.12643	0	32.0281	0	0
BSN	0	-6.169	-6.11002	-6.22798	0	32.0278	0	0
CHCHD3	0	-6.17534	-6.11705	-6.23364	0	32.023	0	0
WASF1	0	-6.12347	-6.06118	-6.18576	0	32.0188	0	0
MRPS21	0	-6.31891	-6.27117	-6.36666	0	32.014	0	0
TOMM20	0	-6.09825	-6.03825	-6.15825	0	31.9907	0	0
TMEM160	0	-6.25586	-6.20233	-6.3094	0	31.9882	0	0
KCNK1	0	-6.23055	-6.17326	-6.28784	0	31.9853	0	0
MICAL2	0	-6.1677	-6.10893	-6.22647	0	31.9843	0	0
NLRP1	0	-6.25219	-6.19934	-6.30504	0	31.9579	0	0
BNIP3L	0	-6.12463	-6.06577	-6.1835	0	31.9457	0	0
ATP5A1	0	-6.27942	-6.22589	-6.33294	0	31.9356	0	0
GABRG2	0	-6.04686	-5.98282	-6.1109	0	31.9263	0	0
C11orf49	0	-6.11191	-6.05444	-6.16938	0	31.9212	0	0
ENO2	0	-6.04821	-5.97746	-6.11896	0	31.9026	0	0
UQCRB	0	-6.24613	-6.1933	-6.29896	0	31.8913	0	0
UBE2V2	0	-6.29217	-6.24423	-6.3401	0	31.8853	0	0
RPS2	0	-6.28925	-6.23567	-6.34284	0	31.8771	0	0
HMGB1	0	-6.01711	-5.95185	-6.08237	0	31.8651	0	0
ATP6V0B	0	-6.16513	-6.10807	-6.22219	0	31.8597	0	0
SEPT7	0	-6.0817	-6.01418	-6.14922	0	31.8545	0	0
PAPSS1	0	-6.21022	-6.15828	-6.26216	0	31.8515	0	0
RAB1A	0	-6.24928	-6.20096	-6.2976	0	31.843	0	0
CAP2	0	-6.07035	-6.00688	-6.13381	0	31.8405	0	0
MGEA5	0	-6.09398	-6.03441	-6.15354	0	31.8321	0	0
GABARAPL1	0	-6.21136	-6.16163	-6.26109	0	31.832	0	0
KIAA0930	0	-6.10185	-6.04142	-6.16227	0	31.8278	0	0
HNRNPDL	0	-6.10251	-6.04445	-6.16057	0	31.8058	0	0
GLS	0	-6.0317	-5.96726	-6.09613	0	31.7935	0	0
RHBDD2	0	-6.06176	-6.00055	-6.12298	0	31.7908	0	0
TCF25	0	-6.08832	-6.02889	-6.14775	0	31.7888	0	0
HMGN3	0	-6.158	-6.10426	-6.21175	0	31.7837	0	0
CKB	0	-6.14314	-6.06778	-6.2185	0	31.783	0	0
RPL28	0	-6.16212	-6.10732	-6.21691	0	31.7759	0	0
UGP2	0	-6.25415	-6.20322	-6.30508	0	31.7691	0	0
WBP2	0	-6.14105	-6.08566	-6.19644	0	31.7599	0	0
ACYP2	0	-6.07193	-6.01236	-6.1315	0	31.7522	0	0
VAPA	0	-6.0947	-6.04068	-6.14873	0	31.7466	0	0
SERINC3	0	-6.04756	-5.98746	-6.10767	0	31.7132	0	0
RPS25	0	-6.23445	-6.18229	-6.2866	0	31.7123	0	0
UBE2D3	0	-6.08196	-6.02749	-6.13644	0	31.708	0	0
OSBPL1A	0	-6.01826	-5.95632	-6.0802	0	31.6968	0	0
ATP9A	0	-6.00343	-5.94276	-6.06409	0	31.6686	0	0
FOCAD	0	-6.1029	-6.03755	-6.16824	0	31.6666	0	0
UCHL1	0	-6.13066	-6.05543	-6.2059	0	31.6462	0	0
RABGAP1	0	-6.06618	-6.00776	-6.12461	0	31.6437	0	0
LONRF2	0	-6.02173	-5.96107	-6.08238	0	31.6254	0	0
ZNF483	0	-6.01106	-5.95051	-6.07162	0	31.6167	0	0
PGRMC1	0	-6.14898	-6.0924	-6.20556	0	31.6128	0	0
PTMA	0	-6.03758	-5.97505	-6.10011	0	31.6071	0	0
NGEF	0	-6.12791	-6.07125	-6.18457	0	31.6019	0	0
LMO4	0	-6.00752	-5.93543	-6.07961	0	31.5979	0	0
PRUNE2	0	-6.23899	-6.18283	-6.29514	0	31.5945	0	0
NDRG4	0	-6.03457	-5.96372	-6.10542	0	31.5886	0	0
ELMO1	0	-6.09117	-6.03266	-6.14968	0	31.5884	0	0
CSNK1A1	0	-6.05419	-5.9983	-6.11008	0	31.5878	0	0
FAM126B	0	-6.02749	-5.96971	-6.08528	0	31.5819	0	0
FEZ2	0	-6.15154	-6.09729	-6.2058	0	31.5812	0	0
DIRAS2	0	-6.18522	-6.12588	-6.24457	0	31.5722	0	0
ARHGEF9	0	-6.07897	-6.02382	-6.13412	0	31.5594	0	0
PINK1	0	-6.26611	-6.22061	-6.31161	0	31.5572	0	0
RSRP1	0	-6.10131	-6.04667	-6.15595	0	31.5503	0	0
NUDT3	0	-6.0191	-5.95815	-6.08006	0	31.5424	0	0
PDE5A	0	-6.34	-6.29425	-6.38576	0	31.5222	0	0
APBA2	0	-6.05052	-5.99135	-6.10968	0	31.5121	0	0
RPLP1	0	-6.21369	-6.1605	-6.26688	0	31.5047	0	0
ARHGEF3	0	-6.06974	-6.01221	-6.12727	0	31.502	0	0
PPM1K	0	-6.08983	-6.03381	-6.14586	0	31.479	0	0
KIF5A	0	-6.09379	-6.03792	-6.14967	0	31.4663	0	0
NDUFS1	0	-6.08811	-6.03358	-6.14264	0	31.4634	0	0
HACD3	0	-6.15062	-6.09988	-6.20136	0	31.4591	0	0
PRKAG2	0	-6.10426	-6.04553	-6.163	0	31.4507	0	0
ATP6V1C1	0	-6.13285	-6.0822	-6.1835	0	31.4239	0	0
TSPAN13	0	-6.19968	-6.14949	-6.24987	0	31.4168	0	0
SNU13	0	-6.19724	-6.14464	-6.24984	0	31.4099	0	0
PGM2L1	0	-6.12536	-6.06635	-6.18438	0	31.3854	0	0
RPL35A	0	-6.20664	-6.15735	-6.25593	0	31.3844	0	0
TTC1	0	-6.16537	-6.11743	-6.21332	0	31.3815	0	0
TMEM14A	0	-6.21314	-6.16466	-6.26162	0	31.3812	0	0
SYNJ1	0	-6.0909	-6.03896	-6.14285	0	31.3787	0	0
HOMER1	0	-6.06678	-6.00724	-6.12632	0	31.3684	0	0
SOD2	0	-6.09481	-6.04448	-6.14514	0	31.3579	0	0
UBE3A	0	-6.02712	-5.97364	-6.08061	0	31.3472	0	0
RPL7	0	-6.24369	-6.18969	-6.29768	0	31.3459	0	0
BCAP29	0	-6.11587	-6.0631	-6.16865	0	31.3245	0	0
DNAJB6	0	-6.01065	-5.95227	-6.06903	0	31.3236	0	0
RPL29	0	-6.17189	-6.11982	-6.22395	0	31.3214	0	0
AP3S1	0	-6.20243	-6.15548	-6.24937	0	31.3146	0	0
CES4A	0	-6.31521	-6.27102	-6.35939	0	31.3135	0	0
CA11	0	-6.05661	-6.00003	-6.11318	0	31.3124	0	0
PEA15	0	-6.08562	-6.02852	-6.14271	0	31.3032	0	0
MTDH	0	-6.02775	-5.97284	-6.08266	0	31.2971	0	0
CAPZA2	0	-6.10572	-6.0553	-6.15614	0	31.2908	0	0
UQCRHL	0	-6.27706	-6.23595	-6.31818	0	31.2904	0	0
GLRB	0	-6.06912	-6.01597	-6.12226	0	31.2741	0	0
OPTN	0	-6.18417	-6.13584	-6.2325	0	31.2714	0	0
SERF2	0	-6.1555	-6.10199	-6.20902	0	31.2526	0	0
BNIP3	0	-6.1341	-6.08079	-6.18741	0	31.222	0	0
ATP6V1G1	0	-6.15401	-6.10293	-6.20508	0	31.2209	0	0
SPATS2	0	-6.02671	-5.97266	-6.08076	0	31.2014	0	0
HSPA12A	0	-6.00081	-5.94487	-6.05674	0	31.1749	0	0
SAT2	0	-6.16809	-6.12223	-6.21395	0	31.1659	0	0
PGBD5	0	-6.00216	-5.94417	-6.06016	0	31.1557	0	0
COX7A2L	0	-6.07344	-6.02082	-6.12607	0	31.14	0	0
SCOC	0	-6.1183	-6.06807	-6.16853	0	31.1012	0	0
KDM5B	0	-6.04577	-5.99215	-6.09938	0	31.0945	0	0
RPS7	0	-6.21223	-6.16642	-6.25804	0	31.0831	0	0
NRD1	0	-6.05434	-6.00007	-6.10862	0	31.0606	0	0
SAP18	0	-6.15953	-6.11066	-6.2084	0	31.0413	0	0
RPL32	0	-6.04263	-5.98533	-6.09992	0	31.008	0	0
SPCS1	0	-6.16852	-6.1203	-6.21674	0	30.9985	0	0
RPL19	0	-6.1043	-6.05223	-6.15637	0	30.9734	0	0
VPS41	0	-6.04985	-6.00003	-6.09967	0	30.9545	0	0
B4GAT1	0	-6.06293	-6.00865	-6.11721	0	30.9514	0	0
FAM134A	0	-6.10616	-6.05874	-6.15357	0	30.9321	0	0
MYO1D	0	-6.0412	-5.98075	-6.10166	0	30.8248	0	0
UQCRC2	0	-6.0699	-6.01967	-6.12013	0	30.7675	0	0
ETS2	0	-6.08925	-6.04526	-6.13324	0	30.7647	0	0
SLC25A6	0	-6.04265	-5.98969	-6.09561	0	30.7098	0	0
RPL34	0	-6.06135	-6.00996	-6.11273	0	30.6887	0	0
BTF3	0	-6.12588	-6.07814	-6.17362	0	30.6821	0	0
H2AFZ	0	-6.06306	-6.01231	-6.11381	0	30.6653	0	0
AP2S1	0	-6.06216	-6.0113	-6.11302	0	30.6603	0	0
AKAP13	0	-6.07236	-6.02245	-6.12228	0	30.6593	0	0
PGK1	0	-6.05151	-5.99961	-6.10341	0	30.6511	0	0
BAALC	0	-6.01348	-5.95946	-6.06751	0	30.6465	0	0
TMEM59	0	-6.05599	-6.00876	-6.10322	0	30.6361	0	0
PITHD1	0	-6.054	-6.00401	-6.10399	0	30.6169	0	0
TM2D3	0	-6.05212	-6.00336	-6.10087	0	30.6075	0	0
BEX5	0	-6.09755	-6.04972	-6.14538	0	30.6059	0	0
RPS8	0	-6.02275	-5.97099	-6.07451	0	30.5902	0	0
CHGB	0	-6.12295	-6.0744	-6.17151	0	30.5398	0	0
RAN	0	-6.06425	-6.01239	-6.11611	0	30.5342	0	0
RPL8	0	-6.06967	-6.01828	-6.12105	0	30.5261	0	0
SLC25A4	0	-6.02302	-5.9692	-6.07685	0	30.5069	0	0
TCEB1	0	-6.06791	-6.02321	-6.11262	0	30.4767	0	0
MAP1LC3A	0	-6.02467	-5.97588	-6.07346	0	30.4532	0	0
HSPA8	0	-6.08812	-6.03316	-6.14307	0	30.3969	0	0
MOAP1	0	-6.00904	-5.95877	-6.05931	0	30.237	0	0
CRLF3	0	-6.00808	-5.95726	-6.05891	0	30.2366	0	0
RPL3	0	-6.02448	-5.97712	-6.07184	0	30.0852	0	0
